# Supplementary material for: The Michigan Genomics Initiative: A biobank linking genotypes and electronic clinical records in Michigan Medicine patients
Source: PubMed Central journal article supplement — Cell Genom. 2023 Jan 31;3(2):100257. doi: 10.1016/j.xgen.2023.100257 (PMC9932985; doi:10.1016/j.xgen.2023.100257), 2023-01-31
Supplement: mmc1.pdf [file mmc1.pdf]

**Cell Genomics, Volume 3**

**Supplemental information**

**The Michigan Genomics Initiative: A biobank  
linking genotypes and electronic clinical  
records in Michigan Medicine patients**

**Matthew Zawistowski, Lars G. Fritsche, Anita Pandit, Brett Vanderwerff, Snehal Patil, Ellen M. Schmidt, Peter VandeHaar, Cristen J. Willer, Chad M. Brummett, Sachin Kheterpal, Xiang Zhou, Michael Boehnke, Gonçalo R. Abecasis, and Sebastian Zöllner**

**Supplementary Material for “The Michigan Genomics Initiative: a biobank linking genotypes and electronic clinical records in Michigan Medicine patients.”**

**Figure S1: Ratio of disease prevalence in MGI and UKB by Phecode categories. Related STAR Methods (Clinical Phenotype Data, Phecodes in UK Biobank).**

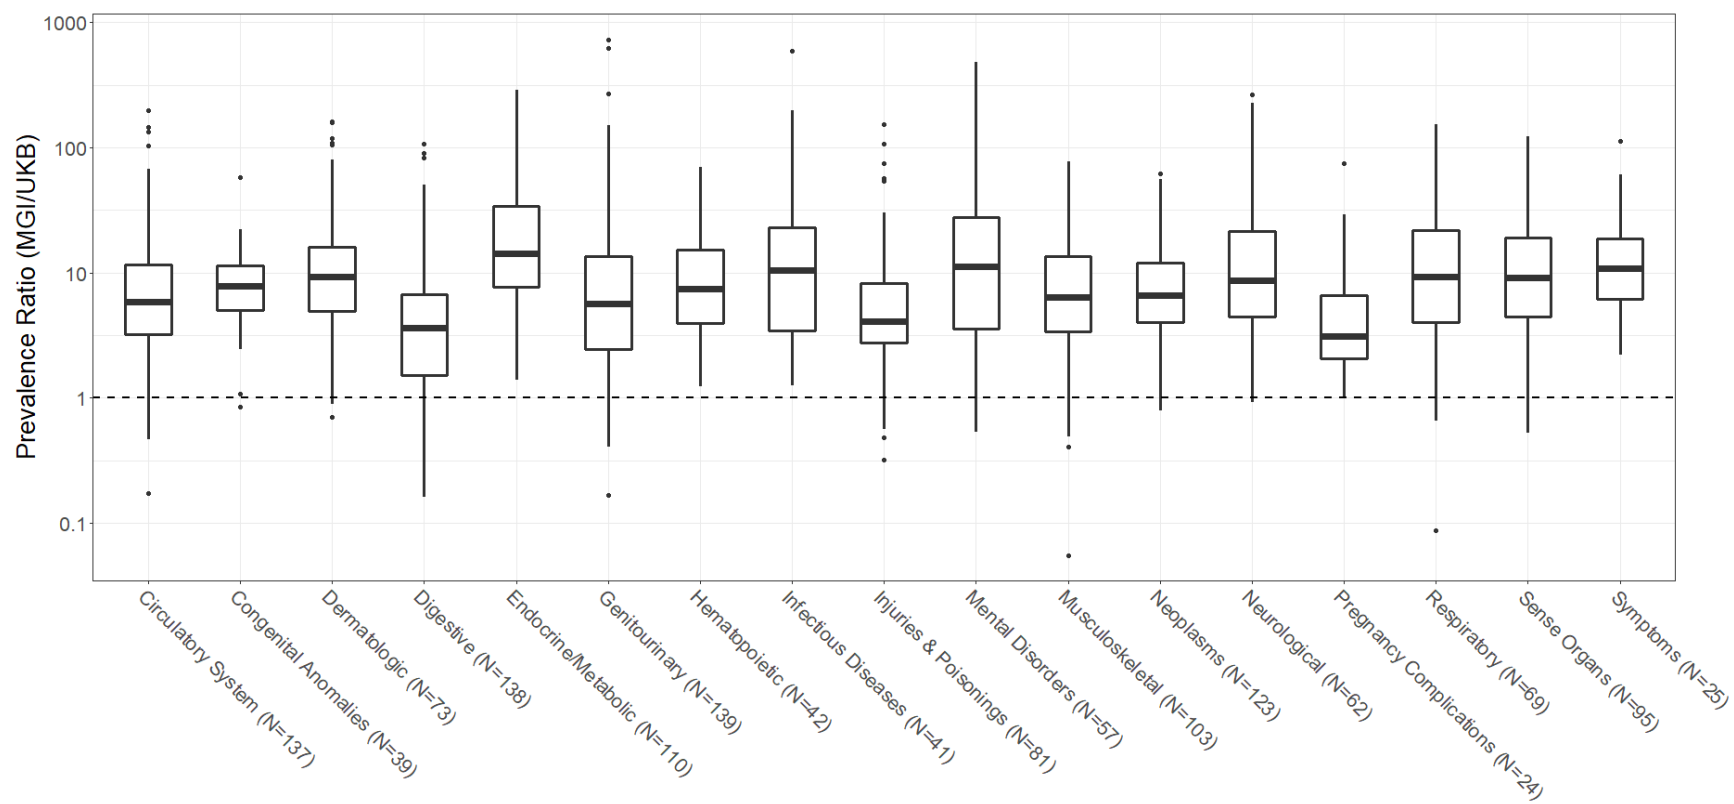

**Figure S2: Unique genetically-inferred familial configurations involving Parent-Offspring, Full-Sibling, second degree and third degree relationships among MGI participants. The numbers are the observed count for each configuration. Related to STAR Methods (Genetic Quality Control Procedures).**

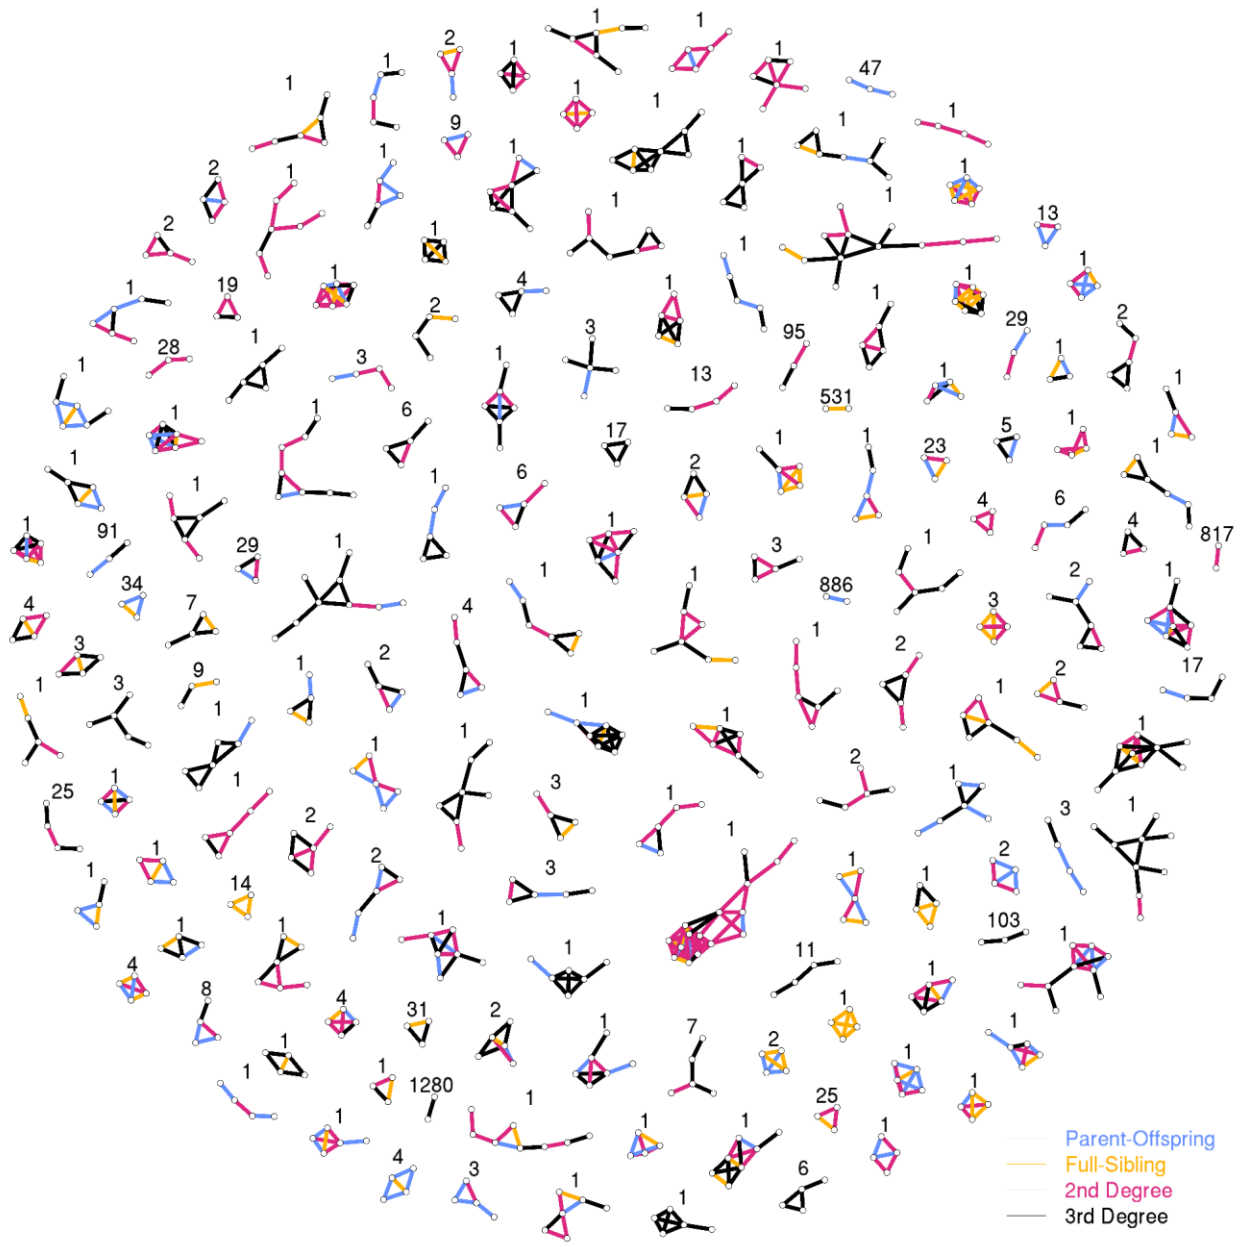

**Figure S3: Comparison of TopMed and HRC based imputation in MGI. Frequency spectrum for TopMed and HRC imputation. The largest gain in coverage for TopMed is at the lower end of the frequency spectrum. Related to Figure 5(C).**

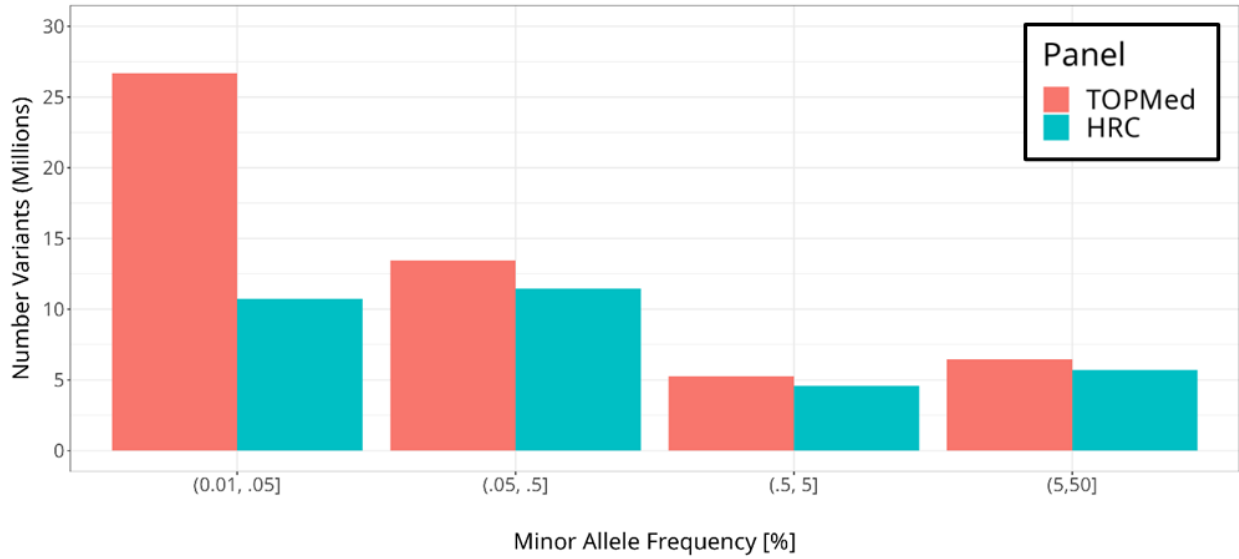

**Figure S4: Comparison of TopMed and HRC imputation accuracy by MAF. TopMed provides increased accuracy for all MAF>0.01 bins, with greatest improvement for SNPs < 5%. Related to Figure 5(C).**

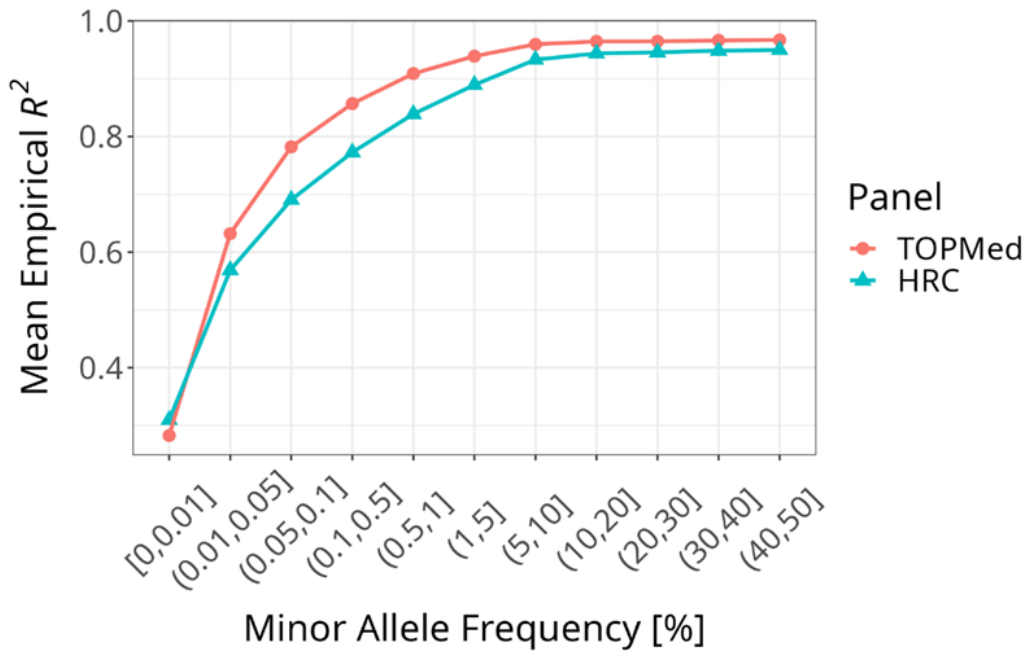

Figure S5: Genomic Control and case count (log10 scale) for 1712 PheCode traits with at least 20 cases. Traits with fewer than N=60 cases (vertical line) showed evidence of severe inflation. We therefore report GWAS results for PheCode traits with at least 60 cases. Related to STAR Methods (Genetic Analysis).

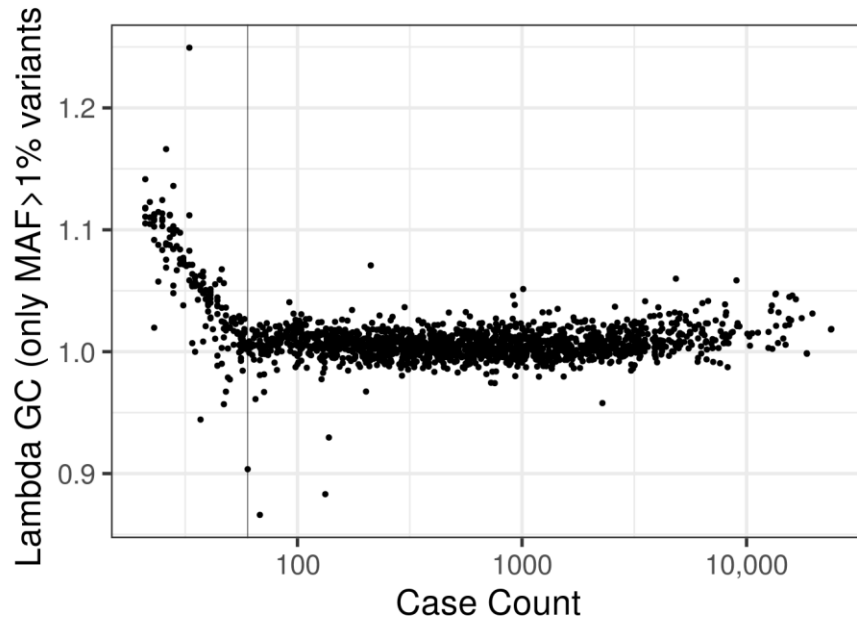

**Figure S6: Ancestry proportions of MGI participants estimated using ADMIXTURE. The top panel (A) shows all MGI participants and the bottom panel (B) shows only participants with <90% estimated EUR ancestry. We created continental ancestry bins for the imputation accuracy analysis by assigning samples whose majority ancestry assignment was at least 25% to the corresponding ancestry bin. Related to STAR Methods (Genetic Quality Control Procedures).**

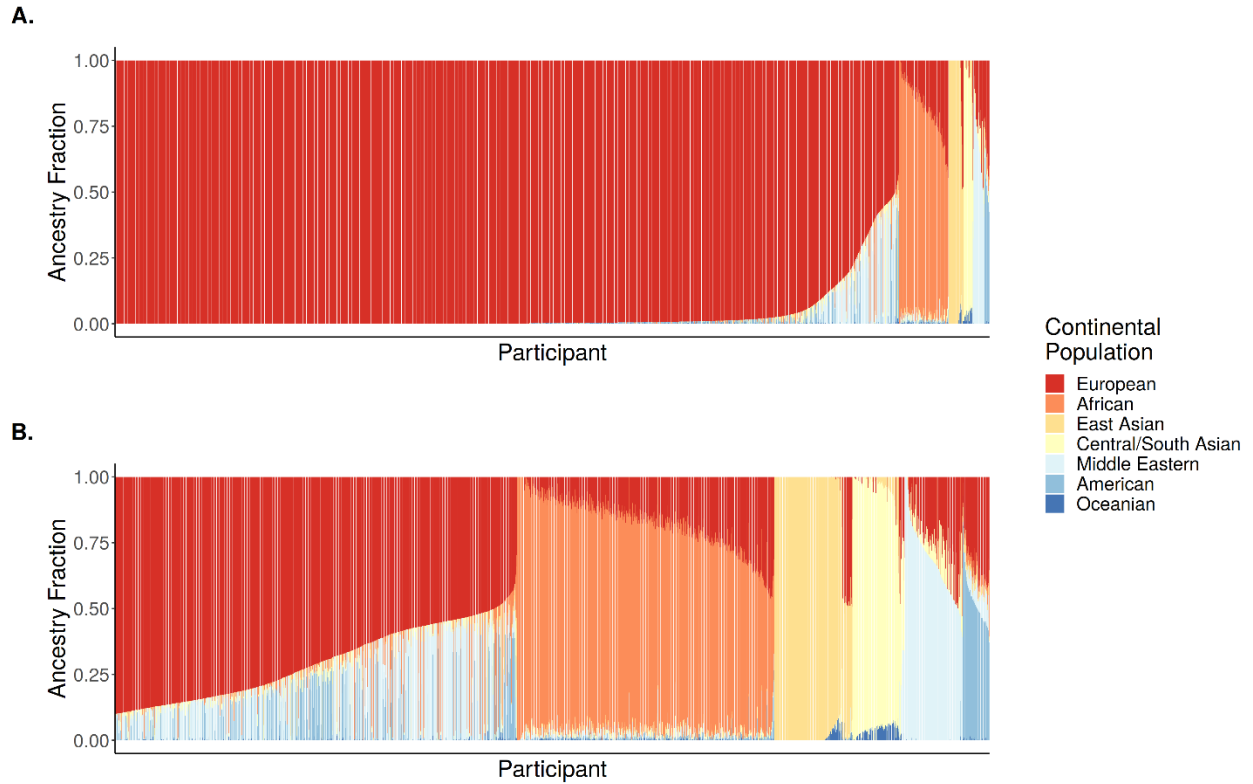

**Table S1. Demographic and Clinical Outcome table including descriptive statistics for quantitative laboratory measures and select phecode traits. Related to Figure 2B.**

|                                                                             | All               | Male              | Female            |
|-----------------------------------------------------------------------------|-------------------|-------------------|-------------------|
| <b>Number of Individuals</b>                                                | 57,055            | 26,732 (47%)      | 30,323 (53%)      |
| <b>Age, yr (range 18-90+; mean <math>\pm</math> SD)</b>                     | 56.44 $\pm$ 17    | 58.38 $\pm$ 17    | 54.74 $\pm$ 16    |
| <b>BMI, kg/m<sup>2</sup></b>                                                | 29.87 $\pm$ 7.0   | 29.69 $\pm$ 6.1   | 30.03 $\pm$ 7.7   |
| <b>Self-Reported Race, N</b>                                                |                   |                   |                   |
| African American                                                            | 3,223             | 1,264             | 1,959             |
| American Indian or Alaska Native                                            | 237               | 112               | 125               |
| Asian                                                                       | 1,324             | 601               | 723               |
| Caucasian                                                                   | 49,605            | 23,534            | 26,071            |
| Native Hawaiian or Pacific Islander                                         | 43                | 14                | 29                |
| Other                                                                       | 1,023             | 463               | 560               |
| Patient Refused                                                             | 200               | 102               | 98                |
| Unknown/Missing                                                             | 1,400             | 643               | 757               |
| <b>Self-Reported Ethnicity, N</b>                                           |                   |                   |                   |
| Hispanic or Latino                                                          | 805               | 337               | 468               |
| Non-Hispanic or Latino                                                      | 34,982            | 16,809            | 18,173            |
| Patient Refused                                                             | 155               | 70                | 85                |
| Unknown/Missing                                                             | 21,113            | 9,517             | 11,596            |
| <b>Quantitative Measurements (mean <math>\pm</math> SD)</b>                 |                   |                   |                   |
| SBP, mm Hg (N=56,293)                                                       | 70.52 $\pm$ 7.4   | 72.45 $\pm$ 7.4   | 68.83 $\pm$ 7.0   |
| LDL-C, mg/dL (N=24,688)                                                     | 100.38 $\pm$ 35.7 | 95.92 $\pm$ 35.2  | 104.65 $\pm$ 35.7 |
| Albumin (N=43,558)                                                          | 3.96 $\pm$ 0.6    | 3.93 $\pm$ 0.6    | 3.99 $\pm$ 0.6    |
| Creatinine (N=50,255)                                                       | 1.21 $\pm$ 1.2    | 1.37 $\pm$ 1.3    | 1.04 $\pm$ 1.0    |
| Glucose (N=50,327)                                                          | 123.37 $\pm$ 56.2 | 127.06 $\pm$ 56.6 | 119.40 $\pm$ 55.4 |
| Mean corpuscular hemoglobin (N=50,246)                                      | 29.8 $\pm$ 2.6    | 29.98 $\pm$ 2.6   | 29.60 $\pm$ 2.6   |
| Thyroid stimulating hormone (N=27,753)                                      | 3.19 $\pm$ 10.6   | 3.21 $\pm$ 9.1    | 3.17 $\pm$ 11.4   |
| <b>Cardiometabolic Phenotypes, Phecode (N cases, % of sample)</b>           |                   |                   |                   |
| Hypertension (401)                                                          | 26,223 (46%)      | 13,858 (52%)      | 12,365 (41%)      |
| Obesity (278.1)                                                             | 17,547 (31%)      | 7,455 (28%)       | 10,092 (33%)      |
| Cardiac Dysrhythmias (427)                                                  | 15,896 (28%)      | 7,853 (29%)       | 8,043 (27%)       |
| Type 2 Diabetes (250.2)                                                     | 11,377 (20%)      | 6,036 (23%)       | 5,341 (18%)       |
| <b>Neurodegenerative and Neurological Phenotypes (N cases, % of sample)</b> |                   |                   |                   |
| Sleep Apnea (327.3)                                                         | 12,418 (22%)      | 6,884 (26%)       | 5,534 (18%)       |
| Epilepsy (345.1)                                                            | 606 (1%)          | 275 (1%)          | 331 (1%)          |
| Parkinson's Disease (332)                                                   | 399 (0.7%)        | 272 (1%)          | 127 (0.4%)        |
| Multiple Sclerosis (335)                                                    | 415 (0.7%)        | 109 (0.4%)        | 306 (1%)          |
| <b>Respiratory and Immunological Phenotypes (N cases, % of sample)</b>      |                   |                   |                   |
| Asthma (495)                                                                | 10,135 (18%)      | 3,446 (13%)       | 6,689 (22%)       |
| Pneumonia (480)                                                             | 5,327 (9%)        | 2,467 (9%)        | 2,860 (9%)        |
| Rheumatoid Arthritis (714.1)                                                | 1,750 (3%)        | 478 (2%)          | 1,272 (4%)        |



|                                                        |              |             |              |
|--------------------------------------------------------|--------------|-------------|--------------|
| Ulcerative Colitis (555.2)                             | 925 (2%)     | 428 (2%)    | 497 (2%)     |
| <b>Oncology Phenotypes (N cases, % of sample)</b>      |              |             |              |
| Skin Cancer (172)                                      | 8,307 (15%)  | 4,580 (17%) | 3,727 (12%)  |
| Melanoma (172.11)                                      | 3,081 (5%)   | 1,772 (7%)  | 1,309 (4%)   |
| Basal Cell Carcinoma (172.21)                          | 3,522 (6%)   | 1,921 (7%)  | 1,601 (5%)   |
| Breast Cancer (174)                                    | 3,418 (6%)   | 46 (0.2%)   | 3,372 (11%)  |
| Prostate Cancer (185)                                  | 3,002 (5%)   | 3,002 (11%) | 0 (0%)       |
| Bladder Cancer (189.2)                                 | 1,746 (3%)   | 1,343 (5%)  | 403 (1%)     |
| <b>Mental Health Phenotypes (N cases, % of sample)</b> |              |             |              |
| Depression (296.2)                                     | 14,889 (26%) | 4,992 (19%) | 9,897 (33%)  |
| Anxiety disorders (300)                                | 14,922 (26%) | 4,810 (18%) | 10,112 (33%) |
| Bipolar (296.1)                                        | 1,134 (2%)   | 357 (1%)    | 777 (3%)     |
| Schizophrenia (295.1)                                  | 115 (0.2%)   | 50 (0.1%)   | 65 (0.2%)    |

**Table S2. Phecode traits with >10-fold enrichment of case samples in MGI compared to UKB.  
Related STAR Methods (Clinical Phenotype Data, Phecodes in UK Biobank).**

| PheCode | Description                                            | Category              | MGI Cases | MGI Controls | UKB Cases | UKB Controls | MGI:UKB<br>Case Ratio |
|---------|--------------------------------------------------------|-----------------------|-----------|--------------|-----------|--------------|-----------------------|
| 611.1   | Abnormal mammogram                                     | genitourinary         | 4,851     | 42,782       | 56        | 400,113      | 86.6                  |
| 079.1   | Varicella infection                                    | infectious diseases   | 4,143     | 39,472       | 64        | 401,601      | 64.7                  |
| 599.8   | Other symptoms involving urinary system                | genitourinary         | 3,888     | 35,037       | 62        | 383,297      | 62.7                  |
| 300.4   | Dysthymic disorder                                     | mental disorders      | 2,050     | 27,399       | 53        | 363,984      | 38.7                  |
| 792     | Abnormal Papanicolaou smear of cervix and cervical HPV | genitourinary         | 2,788     | 17,968       | 97        | 193,707      | 28.7                  |
| 327.4   | Insomnia                                               | neurological          | 4,252     | 35,287       | 163       | 401,998      | 26.1                  |
| 278.4   | Abnormal weight gain                                   | endocrine/metabolic   | 1,625     | 32,094       | 66        | 396,288      | 24.6                  |
| 415.11  | Pulmonary embolism and infarction, acute               | circulatory system    | 1,825     | 47,402       | 75        | 400,268      | 24.3                  |
| 338.2   | Chronic pain                                           | neurological          | 9,127     | 34,356       | 379       | 406,436      | 24.1                  |
| 110.11  | Dermatophytosis of nail                                | infectious diseases   | 1,664     | 44,101       | 74        | 404,551      | 22.5                  |
| 272.12  | Hyperglyceridemia                                      | endocrine/metabolic   | 1,210     | 31,466       | 58        | 371,432      | 20.9                  |
| 272.13  | Mixed hyperlipidemia                                   | endocrine/metabolic   | 3,221     | 31,466       | 164       | 371,432      | 19.6                  |
| 313     | Pervasive developmental disorders                      | mental disorders      | 1,449     | 49,104       | 76        | 406,624      | 19.1                  |
| 279.7   | Other immunological findings                           | endocrine/metabolic   | 4,513     | 44,339       | 248       | 406,707      | 18.2                  |
| 613.5   | Mastodynia                                             | genitourinary         | 1,396     | 47,335       | 77        | 405,229      | 18.1                  |
| 338     | Pain                                                   | neurological          | 13,542    | 34,356       | 766       | 406,436      | 17.7                  |
| 690.1   | Seborrheic dermatitis                                  | dermatologic          | 924       | 43,414       | 53        | 400,950      | 17.4                  |
| 340.1   | Migraine with aura                                     | neurological          | 3,640     | 43,699       | 211       | 397,071      | 17.3                  |
| 464     | Acute sinusitis                                        | respiratory           | 3,174     | 39,262       | 196       | 404,740      | 16.2                  |
| 949     | Allergies, other                                       | injuries & poisonings | 6,371     | 35,760       | 396       | 403,085      | 16.1                  |
| 938.2   | Chronic dermatitis due to solar radiation              | dermatologic          | 3,992     | 35,760       | 251       | 403,085      | 15.9                  |
| 338.1   | Acute pain                                             | neurological          | 6,081     | 34,356       | 393       | 406,436      | 15.5                  |
| 246     | Other disorders of thyroid                             | endocrine/metabolic   | 6,055     | 39,246       | 397       | 389,743      | 15.3                  |
| 250.42  | Other abnormal glucose                                 | endocrine/metabolic   | 6,284     | 36,652       | 418       | 387,082      | 15.0                  |

|        |                                                        |                       |        |        |       |         |      |
|--------|--------------------------------------------------------|-----------------------|--------|--------|-------|---------|------|
| 261.4  | Vitamin D deficiency                                   | endocrine/metabolic   | 6,612  | 40,977 | 446   | 404,730 | 14.8 |
| 456    | Chronic venous insufficiency [CVI]                     | circulatory system    | 2,633  | 36,953 | 183   | 367,908 | 14.4 |
| 356    | Hereditary and idiopathic peripheral neuropathy        | neurological          | 2,114  | 47,411 | 152   | 405,102 | 13.9 |
| 367.2  | Astigmatism                                            | sense organs          | 2,622  | 43,024 | 189   | 404,787 | 13.9 |
| 627.2  | Symptomatic menopause                                  | genitourinary         | 2,534  | 17,353 | 183   | 189,130 | 13.8 |
| 090    | Sexually transmitted infections (not HIV or hepatitis) | infectious diseases   | 953    | 50,467 | 71    | 407,129 | 13.4 |
| 690    | Erythematousquamous dermatosis                         | dermatologic          | 929    | 43,414 | 71    | 400,950 | 13.1 |
| 790    | Nonspecific findings on examination of blood           | symptoms              | 1,930  | 44,032 | 149   | 400,617 | 13.0 |
| 401.3  | Other hypertensive complications                       | circulatory system    | 1,827  | 26,620 | 144   | 328,788 | 12.7 |
| 840    | Sprains and strains                                    | injuries & poisonings | 5,944  | 42,380 | 469   | 406,668 | 12.7 |
| 605    | Erectile dysfunction [ED]                              | genitourinary         | 3,436  | 16,004 | 276   | 167,468 | 12.4 |
| 704.8  | Other specified diseases of hair and hair follicles    | dermatologic          | 943    | 46,497 | 76    | 400,627 | 12.4 |
| 476    | Allergic rhinitis                                      | respiratory           | 12,834 | 31,134 | 1,052 | 388,553 | 12.2 |
| 136    | Other infectious and parasitic diseases                | infectious diseases   | 2,459  | 47,630 | 205   | 406,672 | 12.0 |
| 277.51 | Lipoprotein disorders                                  | endocrine/metabolic   | 620    | 48,876 | 52    | 405,784 | 11.9 |
| 429.1  | Heart transplant/surgery                               | circulatory system    | 762    | 45,087 | 64    | 400,869 | 11.9 |
| 573.9  | Abnormal serum enzyme levels                           | digestive             | 2,452  | 41,044 | 209   | 398,276 | 11.7 |
| 279    | Disorders involving the immune mechanism               | endocrine/metabolic   | 2,845  | 44,339 | 249   | 406,707 | 11.4 |
| 483    | Acute bronchitis and bronchiolitis                     | respiratory           | 2,122  | 42,165 | 193   | 396,438 | 11.0 |
| 505    | Other pulmonary inflammation or edema                  | respiratory           | 659    | 43,653 | 61    | 395,582 | 10.8 |
| 938    | Dermatitis due to solar radiation                      | dermatologic          | 4,174  | 35,760 | 387   | 403,085 | 10.8 |
| 527.7  | Disturbance of salivary secretion                      | digestive             | 667    | 47,262 | 62    | 401,593 | 10.8 |
| 260    | Protein-calorie malnutrition                           | endocrine/metabolic   | 2,103  | 40,977 | 202   | 404,730 | 10.4 |
| 250.4  | Abnormal glucose                                       | endocrine/metabolic   | 7,061  | 36,652 | 681   | 387,082 | 10.4 |
